# Supplementary material for: Polylactide Films with the Addition of Olive Leaf Extract—Physico-Chemical Characterization
Source: MDPI journal article supplement (doi:10.3390/ma14247623), 2021-12-11
Supplement: s1 [file s1]

Supplementary Materials

# Poly lactide Films with the Addition of Olive Leaf Extract— Physico-Chemical Characterization

Sylwia Grabska-Zielińska <sup>1,\*</sup>, Magdalena Gierszewska <sup>1,\*</sup>, Ewa Olewnik-Kruszkowska <sup>1</sup> and Mohamed Bouaziz <sup>2</sup>

<sup>1</sup> Department of Physical Chemistry and Physicochemistry of Polymers, Faculty of Chemistry, Nicolaus Copernicus University in Toruń, Gagarin 7 Street, 87-100 Toruń, Poland; olewnik@umk.pl

<sup>2</sup> Electrochemistry and Environmental Laboratory, National Engineering School of Sfax, University of Sfax, BP1173, Sfax 3038, Tunisia; mohamed.bouaziz@fsg.rnu.tn

\* Correspondence: sylwia.gz@umk.pl (S.G.-Z.); mgd@umk.pl (M.G.)

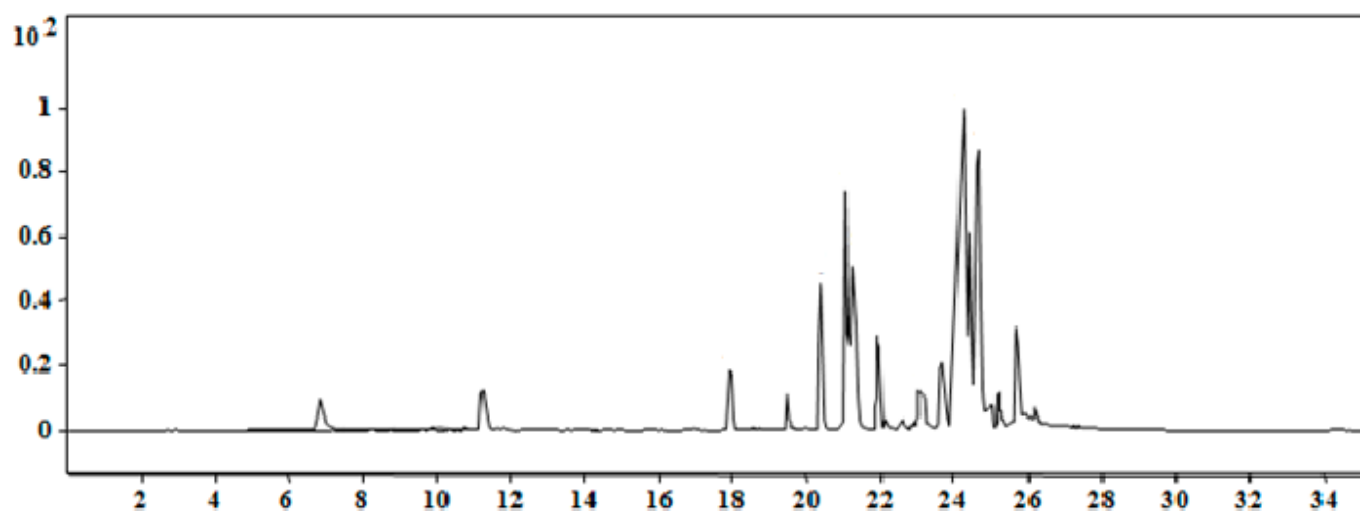

**Figure S1.** Base peak chromatogram of Chemlali olive cultivar leaf extract.

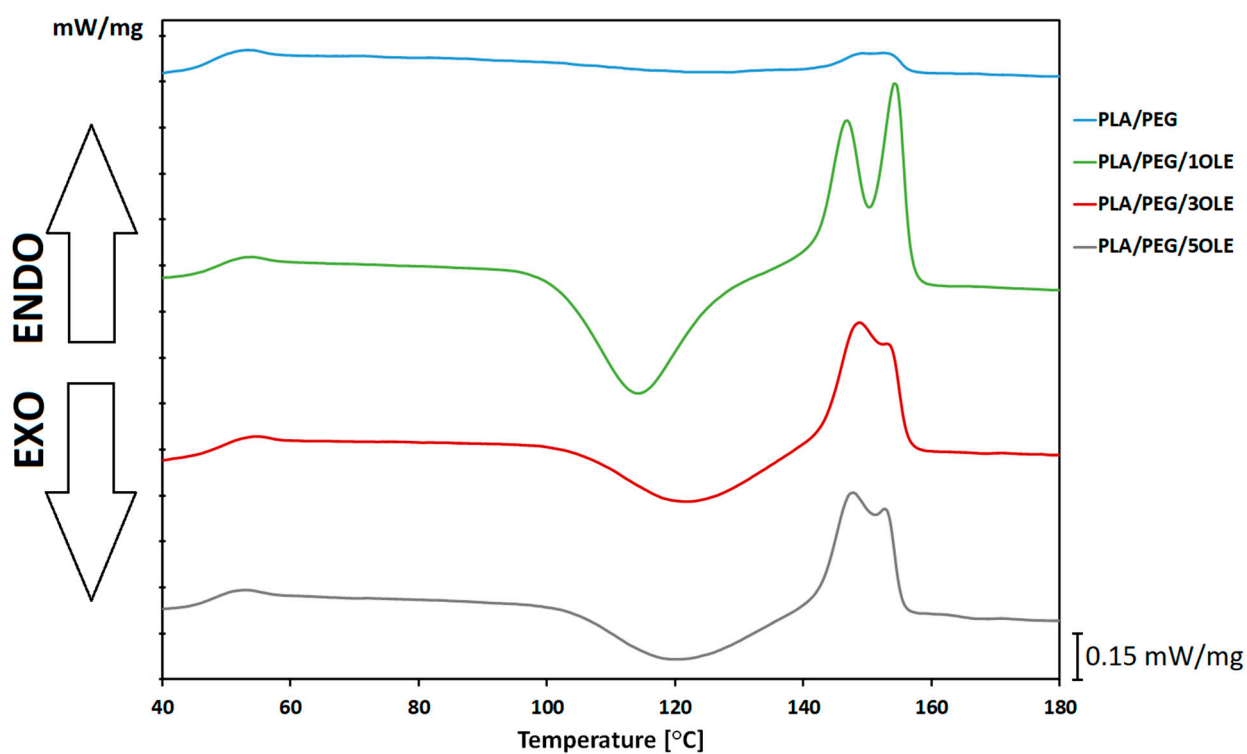

Figure S2. DSC thermograms of PLA/PEG and PLA/PEG/OLE films.

Table S1. DSC thermal data of PLA/PEG and PLA/PEG/OLE films.

| Specimen     | $\Delta H_m$ [J·g <sup>-1</sup> ] | $\Delta H_{cc}$ [J·g <sup>-1</sup> ] | $X_c$ [%] |
|--------------|-----------------------------------|--------------------------------------|-----------|
| PLA/PEG      | 2.50                              | 3.26                                 | -         |
| PLA/PEG/1OLE | 36.83                             | 38.39                                | 1.55      |
| PLA/PEG/3OLE | 22.39                             | 24.06                                | 1.76      |
| PLA/PEG/5OLE | 20.77                             | 22.21                                | 1.61      |

$\Delta H_m$  – melting enthalpy,  $\Delta H_{cc}$  - enthalpy of cold crystallization

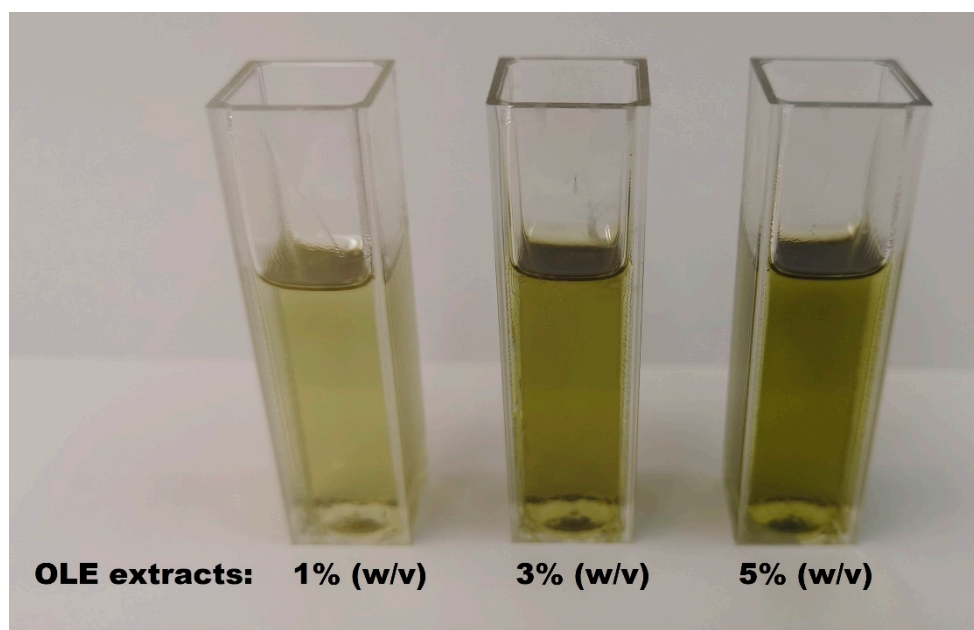

**Figure S3.** Real photo of fresh olive leaf extracts in chloroform.
